# Supplementary material for: Incorporation of fucoxanthin into 3D printed Pickering emulsion gels stabilized by salmon by-product protein/pectin complexes
Source: Royal Society of Chemistry journal article supplement (doi:10.1039/d3fo04945k), 2024-01-01
Supplement: d3fo04945k1.pdf [file d3fo04945k1.pdf]

## Supplementary Data

### **Incorporation of fucoxanthin into 3D printed Pickering emulsion gels stabilized by salmon by-product protein / pectin complexes**

*Xu Zhong<sup>a, b, c, d</sup>, Kuiyou Wang<sup>a, b, c, d</sup>, Zhejin Chen<sup>a, b, c, d</sup>, Siyuan Fei<sup>a, b, c, d</sup>, Jiakuan Li<sup>a, b, c, d</sup>, Mingqian Tan<sup>a, b, c, d</sup>, Wentao Su<sup>a, b, c, d\*</sup>*

<sup>a</sup> Academy of Food Interdisciplinary Science, School of Food Science and Technology, Dalian Polytechnic University, Qinggongyuan1, Ganjingzi District, Dalian, 116034, Liaoning, China

<sup>b</sup> SKL of Marine Food Processing & Safety Control, Dalian Polytechnic University, Dalian, 116034, Liaoning, China

<sup>c</sup> National Engineering Research Center of Seafood, Dalian Polytechnic University, Dalian, 116034, Liaoning, China

<sup>d</sup> Collaborative Innovation Center of Seafood Deep Processing, Dalian Polytechnic University, Dalian, 116034, Liaoning, China

\*Corresponding Author:

Wentao Su, E-mail: suwentao2020@yeah.net. ORCID: 0000-0002-5233-1093

Tel & Fax: +86-411-86318657; Qinggongyuan 1, Ganjingzi District, Dalian 116034, China.

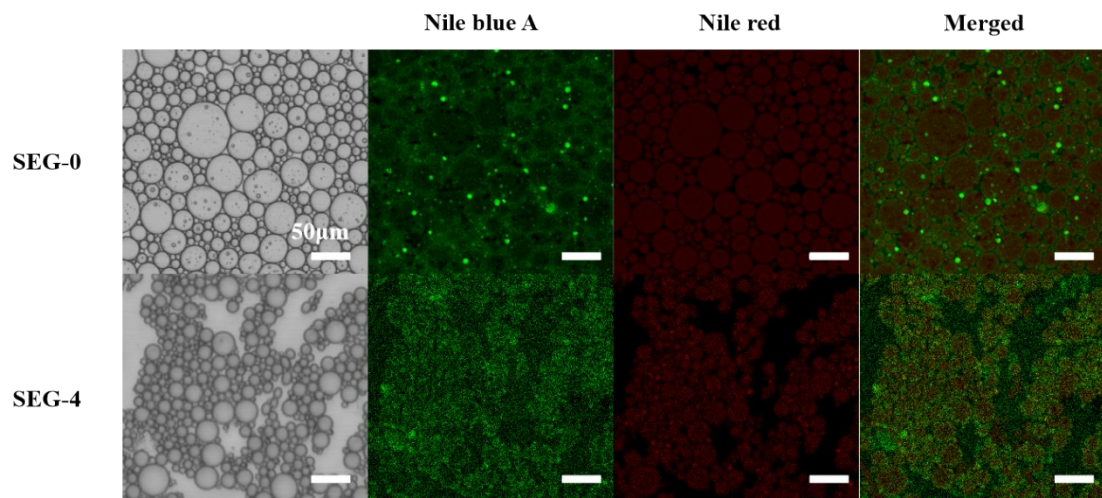

**Fig. S1.** CLSM images of SEG-0 and SEG-4
